# Supplementary material for: Ablation of Acid Ceramidase Impairs Autophagy and Mitochondria Activity in Melanoma Cells
Source: MDPI journal article supplement (doi:10.3390/ijms22063247), 2021-03-23
Supplement: s1 [file s1]

## Supplementary Information

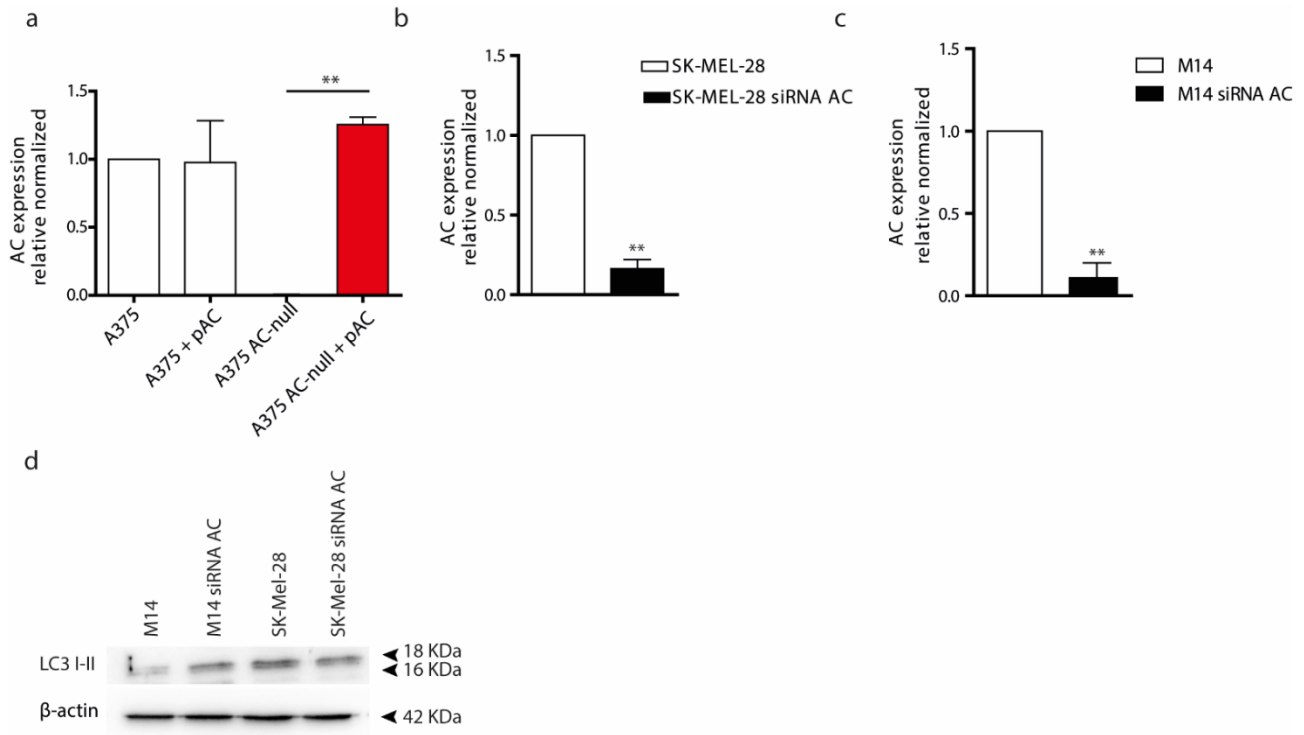

**Supplementary Figure S1.** (a) qRT-PCR of AC expression in A375 and A375 AC-null cells transfected or not with pAC. Results are expressed as mean  $\pm$  SD, with each experiment performed with three biological and three technical replicates (\*\*  $p < 0.01$ . One Way ANOVA and Bonferroni post hoc test). (b,c) M14 and SK-Mel-28 cells were transfected or not with AC siRNA. After 48 h, qRT-PCR of AC was performed. Results are expressed as mean  $\pm$  SD, with each experiment performed in three biological and technical replicates (\*\*  $p < 0.01$  Student  $t$ -test). (d) Western blot on LC3 I-II on M14 and SK-Mel-28 transfected or not with AC siRNA for 48h. Lipidomic profiles of A375 and A375 AC-null cells are available in a previous work published by our team [16].
